# Supplementary material for: Genome-Wide Association Mapping and Genomic Prediction for Adult Stage Sclerotinia Stem Rot Resistance in Brassica Napus (L) Under Field Environments
Source: Research Square preprint supplement (doi:10.21203/rs.3.rs-589440/v1), 2021-06-17
Supplement: Supplementary file 1 [file 71422443f155c7f7d34b7fc1.xlsx]

## Sheet: Sheet1
Supplementary Table S6. List of significant single-nucleotide polymorphisms (SNPs) associated with stem lesion length (LL), stem lesion width (LW), and combENV plant mortality (PM_14D, PM_21D) traits for sclerotinia stem rot resistance identified by the FarmCPU, MLM, GEMMA-MLM
Locus	Chra	SNP ID	Position (bp)	Allelesb	-log10 (P)c	Traits, Env & Modeld	Allelic effecte	R2 f	Previously reported MTAsg
1	1	SCM002759.2_1471693	1471693	A/T	4.3-3.1	LL_E1123, LL_E223, LL_E423, LL_CombENV123	-0.30, -0.22	4.8-7.0
	1	SCM002759.2_1471693	1471693	A/T	6.9-3.3	LW_CombENV123	-1.97; -1.56	5.5
	1	SCM002759.2_1471693	1471693	A/T	4.0-3.2	PM_14D123; PM_21D23	-3.51; -3.34	3.9-5.3
2	1	SCM002759.2_1766199	1766199	A/G	3.6-3.0	LL_E2123, LL_CombENV123	0.47, 0.37	4.6-5.6
3	1	SCM002759.2_2561773	2561773	C/T	6.6-3.0	LW_E3123, LW_CombENV23	4.42, 1.90	4.9-12.1
4	1	SCM002759.2_4235780	4235780	A/C	3.5-3.2	LW_E2123	2.42, 2.32	5.1
	1	SCM002759.2_4239970	4239970	A/C	4.8-3.3	LL_E2123, LL_E423, LL_CombENV23	-0.34; -0.25	5.4-7.3
	1	SCM002759.2_4239970	4239970	A/C	4.0-3.3	LW_E2123, LW_E4123, LW_CombENV23	-3.26, -2.26	5.7-6.0
5	1	SCM002759.2_5322870	5322870	T/A	3.5-3.3	PM_21D23	-6.28	3.9
	1	SCM002759.2_5323805	5323805	G/A	3.4-3.2	PM_21D23	-6.12	3.8
6	1	SCM002759.2_5478454	5478454	C/T	3.4-3.0	LW_E43, LW_CombENV23	2.78	5.2
	1	SCM002759.2_5478454	5478454	C/T	3.5-3.3	LL_E223	0.38	5.1
7	1	SCM002759.2_11482241	11482241	C/T	3.1-3.4	LL_E1123, LL_E33, LL_CombENV13	-0.28; -0.27	5.4	Wu et al. 2013 (12.44-19.86 Mb)
8	1	SCM002759.2_12025515	12025515	A/G	3.5-3.3	LW_E1123	2.35; 2.33	6.1	Wu et al. 2013 (12.44-19.86 Mb)
9	1	SCM002759.2_31973754	31973754	A/C	3.5-3.2	LW_E4123	-2.48; -2.50	5.4
10	2	SCM002760.2_1865667	1865667	A/C	4.8-3.0	LL_E223, LL_E4123, LL_CombENV23	-0.70, -0.43	4.5-7.7
	2	SCM002760.2_1865667	1865667	A/C	4.5-3.6	LW_E4123, LW_CombENV23	-4.27, -5.98	6.2-7.3
11	2	SCM002760.2_10378033	10378033	G/A	3.5-3.3	LL_E423	-0.28	5.3	Shahoveisi et al. 2021 (7.32-10.93 Mb) and (7.59-10.93 Mb)
12	2	SCM002760.2_30827371	30827371	C/G	3.6-3.1	LL_E3123	-0.22; -0.21	6.2
13	3	SCM002761.2_660936	660936	T/A	5.7-3.5	PM_21D123	6.49, 4.85	4.3
14	3	SCM002761.2_6322149	6322149	C/G	3.8-3.3	LW_E2123	-2.70; -2.78	5.7
15	3	SCM002761.2_8296124	8296124	G/A	3.4-3.2	PM_14D123	5.41	4.8
16	3	SCM002761.2_11084205	11084205	G/A	3.7-3.1	LW_E223; CombENV1	5.2; 2.4	4.9
17	3	SCM002761.2_11191427	11191427	T/A	3.4-3.3	LW_E213	-6.47
18	3	SCM002761.2_17320071	17320071	T/A	3.8-3.1	LL_E2123	-0.56; -0.51	4.8
19	3	SCM002761.2_28225133	28225133	T/C	3.7-3.4	LL_E3123	-0.36	7.2
	3	SCM002761.2_28225133	28225133	T/C	3.7-3.4	LW_E323	-3.34	6.7
20	3	SCM002761.2_28954312	28954312	T/C	3.4-3.2	LW_E4123	4.91; 4.76	5.3
21	3	SCM002761.2_30742237	30742237	T/C	3.4-3.0	LL_E1123, LL_CombENV3	0.41	5.4
22	3	SCM002761.2_31300829	31300829	G/A	3.4-3.2	PM_21D23	7.94	3.8
23	3	SCM002761.2_31986941	31986941	G/A	3.9-3.0	PM_14D123, PM_21D23	4.43, 4.15	3.6-5.5
24	3	SCM002761.2_35236913	35236913	C/A	3.5-3.2	LL_E3123	-0.20	6.7
	3	SCM002761.2_35236913	35236913	C/A	8.7-3.6	LW_E1123, LW_E3123	-2.07, -1.84	6.7-8.2
25	3	SCM002761.2_36170515	36170515	G/A	5.4-4.0	LL_E1123, LL_E3123, LL_CombENV123	0.26, 0.23	7.0-9.9
	3	SCM002761.2_36170515	36170515	G/A	7.0-3.3	LW_E1123, LW_E323, LW_CombENV123	2.24, 1.52	5.6-8.7
26	4	SCM002762.2_3551539	3551539	C/T	3.4-3.0	LL_E4123, LL_CombENV123	0.61, 0.45	4.8-5.2
27	4	SCM002762.2_16168004	16168004	G/C	3.5-3.1	PM_14D13, PM_21D23	4.07, 3.79	4
28	4	SCM002762.2_20212672	20212672	T/A	4.5-3.0	LL_E3123,LL_CombENV13	-0.56; -0.44	5.0-8.6
29	4	SCM002762.2_20789292	20789292	G/A	3.7-3.1	PM_21D23	-3.32	3.7
	4	SCM002762.2_20860192	20860192	A/T	4.0-3.7	PM_21D23	4.11	4.6
30	5	SCM002763.2_1779846	1779846	G/A	4.4-3.1	LW_E13; LW_E323; LW_CombENV23	-2.47; -2.15	5.2-7.1
31	5	SCM002763.2_15914063	15914063	G/A	5.2-3.0	LL_E2123, LL_E4123, LL_CombENV123	-0.59; -0.33	5.0-8.0
	5	SCM002763.2_15914063	15914063	G/A	5.1-3.3	LW_E2123, LW_E4123, LW_CombENV23	-5.49, -3.18	5.5-7.8
	5	SCM002763.2_15924240	15924240	T/C	3.5-3.2	LW_E213	2.73
32	5	SCM002763.2_16279322	16279322	A/C	3.7-3.1	LL_E3123, LL_CombENV23	-0.39; -0.34	5.1-7.2
	5	SCM002763.2_16279322	16279322	A/C	5.8-3.0	LW_E113, LW_E3123, LW_CombENV123	-3.89, -2.66	5.4-8.0
33	5	SCM002763.2_24009625	24009625	C/G	3.5-3.2	LW_E1123	2.69; 2.58	6
34	5	SCM002763.2_28142332	28142332	A/G	3.9-3.1	LL_E2123	0.24; 0.27	4.7
35	5	SCM002763.2_28608175	28608175	A/G	3.5-3.3	LL_E2123	0.42; 0.38	5.1
	5	SCM002763.2_28608175	28608175	A/G	3.5-3.0	LW_E2123, LW_CombENV3	4.16	5.2
36	6	SCM002764.2_8266872	8266872	G/C	3.5-3.0	PM_21D23	5.36	3.6
37	6	SCM002764.2_24985572	24985572	G/A	3.4-3.2	PM_21D23	3.20	3.8	Wu et al. 2019 (21.63-23.50 Mb)
38	6	SCM002764.2_25241979	25241979	C/A	3.3-3.0	LL_E113, LL_E323, LL_CombENV123	-0.47; -0.45	5.0-5.9	Wu et al. 2019 (21.63-23.50 Mb)
	6	SCM002764.2_25241979	25241979	C/A	4.5-3.2	LW_E1123, LW_E3123, LW_CombENV123	-5.10, -3.15	5.2-8.0	Wu et al. 2019 (21.63-23.50 Mb)
39	6	SCM002764.2_29348402	29348402	A/C	5.3-3.1	LW_E21, LW_E413, LW_CombENV123	-2.60, -1.43	5.5
40	6	SCM002764.2_33502340	33502340	C/A	3.6-3.2	LW_E113; LW_E33	-3.20
41	6	SCM002764.2_33622715	33622715	T/C	3.4-3.0	LW_E23; LW_E43; LW_CombENV23	1.77	5.3
42	7	SCM002765.2_25991221	25991221	G/C	3.7-3.1	LL_E1123, LL_E2123, LL_CombENV3	-0.63; -0.51	5.4-5.5
43	8	SCM002766.2_1982656	1982656	G/C	4.6-3.1	LL_E3123, LL_E4123, LL_CombENV123	-0.57; -0.38	7.0-7.5
44	8	SCM002766.2_13657808	13657808	T/G	3.5-3.0	LL_E3123	-0.41	6	Wei et al. 2016 (15.01-15.43 Mb)
	8	SCM002766.2_13657808	13657808	T/G	3.6-3.1	LW_E323	-3.76	5.9	Wei et al. 2016 (15.01-15.43 Mb)
45	8	SCM002766.2_13864870	13864870	A/G	3.7-3.1	LL_E2123, LL_E4123, LL_CombENV123	0.67, 0.47	5.2-5.7	Wei et al. 2016 (15.01-15.43 Mb)
46	8	SCM002766.2_17407234	17407234	G/T	3.5-3.3	PM_21D23	-10.66	4	Wei et al. 2016 (15.01-15.43 Mb)
47	8	SCM002766.2_20621551	20621551	A/T	3.6-3.4	LW_E223	2.64	5.4
48	8	SCM002766.2_20760271	20760271	G/C	3.9-3.2	LW_E323; LW_CombENV23	2.35; 2.06	5.4-7.2
49	8	SCM002766.2_20760271	20760271	G/C	4.3-3.6	PM_14D123, PM_21D23	4.01, 3.82	5.0-5.4
50	8	SCM002766.2_22920266	22920266	T/C	3.8-3.3	PM_14D3, PM_21D23	7.24	4.4
51	9	SCM002767.2_35588232	35588232	T/C	6.8-3.9	PM_21D123	-7.47, -5.64	4.8
52	9	SCM002767.2_36527400	36527400	T/C	3.8-3.1	PM_14D123, PM_21D3	-5.83	5.4
53	9	SCM002767.2_37664281	37664281	A/G	3.9-3.7	LL_E4123	-0.34	6.2
54	9	SCM002767.2_37671479	37671479	G/A	3.6-3.1	LL_E1123, LL_E21	-0.31; -0.27	5.9
	9	SCM002767.2_37671479	37671479	G/A	4.0-3.2	LW_E1123, LW_CombENV3	-2.60; -2.64	6.9
55	9	SCM002767.2_39128782	39128782	T/C	3.6-3.2	LL_E1123, LL_CombENV123	-0.60; -0.56	5.4-6.0
56	9	SCM002767.2_43041855	43041855	C/T	3.8-3.5	LL_E3123	0.65	7.1
57	9	SCM002767.2_43331392	43331392	C/A	3.4-3.0	PM_14D123, PM_21D23	-3.43, -3.30	3.6-4.6
	9	SCM002767.2_43506803	43506803		3.4-3.1	PM_21D23	3.26	3.7
58	9	SCM002767.2_45297735	45297735	T/C	4.0-3.3	LL_E2123, LL_E413, LL_CombENV2	-0.47; -0.33	5.1-6.1
	9	SCM002767.2_45297735	45297735	T/C	3.4-3.1	LW_CombENV23	-2.95	5.1
59	9	SCM002767.2_45841268	45841268	A/T	3.5-3.0	LL_E3123, LL_CombENV13	0.44, 0.43	6
	9	SCM002767.2_45841268	45841268	A/T	5.9-3.8	LW_E3123	4.58; 3.56	7.6
60	10	SCM002768.2_2190513	2190513	A/C	3.5-3.1	LW_E1123, LW_E323	3.57; 3.41	6
61	10	SCM002768.2_4273597	4273597	G/A	4.0-3.1	PM_14D13, PM_21D23	-11.29, -9.48	4.5
62	10	SCM002768.2_5144576	5144576	T/C	7.4-3.2	PM_14D123, PM_21D123	5.74, 4.04	4.7-7.7
63	10	SCM002768.2_12144744	12144744	T/C	3.4-3.2	LW_E323	2.62	6.3
64	10	SCM002768.2_21099405	21099405	G/C	3.5-3.0	LW_E213; LW_E413	2.89; 2.47
65	11	SCM002769.2_6223969	6223969	T/C	4.4-3.3	LL_E1123, LL_E3123, LL_CombENV123	-0.45; -0.38	6.0-7.3
	11	SCM002769.2_6223969	6223969	T/C	3.4-3.1	LW_E1123 , LW_CombENV1	-3.43	5.7
	11	SCM002769.2_6223969	6223969	T/C	3.5-3.3	PM_14D123	-6.05	5
66	11	SCM002769.2_46192098	46192098	T/C	4.2-3.0	LL_E2123, LL_E423, LL_CombENV23	-0.74; -0.52	4.9-6.4
	11	SCM002769.2_46192098	46192098	T/C	3.9-3.0	LW_E2123, LW_CombENV23	-7.37, -4.75	5.0-5.8
	11	SCM002769.2_46192098	46192098	T/C	4.1-3.0	PM_14D123, PM_21D123	-9.69, -5.60	4.4-4.8
67	12	SCM002770.2_25096010	25096010	A/T	3.6-3.0	LL_E3123, LL_CombENV1	0.50, 0.49	6.1
	12	SCM002770.2_25096010	25096010	A/T	3.8-3.1	LW_E1123, LW_E323; LW_CombENV3	4.70, 4.50	5.9-6.2
68	12	SCM002770.2_32020747	32020747	A/G	4.0-3.0	LL_E2123, LL_E413, LL_CombENV123	0.46, 0.34	5.1-6.0
	12	SCM002770.2_32020747	32020747	A/G	4.3-3.0	LW_E1123, LW_E21, LW_E4123, LW_CombENV123	4.04, 1.80	4.9-6.2
69	12	SCM002770.2_43963414	43963414	A/T	3.6-3.0	LW_E213, LW_E4123	-3.02; -2.71	5.1
	12	SCM002770.2_44006308	44006308	G/A	3.5-3.1	LW_E213; LW_E413	2.88; 2.51
	12	SCM002770.2_44012322	44012322	C/T	3.6-3.0	LW_E4123, LW_CombENV1	-2.78, -2.68	5.5
70	12	SCM002770.2_59170961	59170961	A/C	3.7-3.4	LW_E323	-5.15	6.8
71	12	SCM002770.2_62791159	62791159	T/C	3.6-3.3	LL_E3123	-0.35; -0.34	7
	12	SCM002770.2_62791159	62791159	T/C	3.7-3.4	LW_E323	-3.20	6.7
72	13	SCM002771.2_7740873	7740873	C/A	3.5-3.0	PM_14D13, PM_21D23	4.19, 3.97	3.7
	13	SCM002771.2_7893201	7893201	C/G	5.0-3.1	LL_E2123, LL_E4123, LL_CombENV13	0.78, 0.47	5.7-7.9
	13	SCM002771.2_7893201	7893201	C/G	5.0-3.5	LW_E2123, LW_E4123, LW_CombENV23	7.51, 4.54	6.0-7.1
73	13	SCM002771.2_22853068	22853068	G/A	3.7-3.0	LL_E2123, LL_E4123, LL_CombENV123	-0.50; -0.38	4.9-5.3	Qasim et al. 2020 (22.21-30.60 Mb)
	13	SCM002771.2_22853068	22853068	G/A	3.4-3.0	LW_E413, LW_CombENV23	-4.24, -3.34	4.9	Qasim et al. 2020 (22.21-30.60 Mb)
74	13	SCM002771.2_27877818	27877818	G/C	3.4-3.2	LW_E4123	-5.67; -5.77	5.4	Qasim et al. 2020 (22.21-30.60 Mb); Shahoveisi et al. 2021 (23.5-31.7 Mb)
75	13	SCM002771.2_45250459	45250459	T/G	3.8-3.5	LL_E1123	0.26	6.2	Qasim et al. 2020 (30.60-47.86 Mb)
	13	SCM002771.2_45250459	45250459	T/G	3.4-3.2	LW_E1123	2.22; 2.20	5.9	Qasim et al. 2020 (30.60-47.86 Mb)
76	13	SCM002771.2_48097242	48097242	G/A	3.9-3.1	LW_E1123, LW_CombENV23	-4.19, -3.81	5.2-6.9	Qasim et al. 2020 (30.60-47.86 Mb) and (47.86-50.63 Mb)
77	13	SCM002771.2_56900783	56900783	G/A	3.8-3.0	LL_E1123, LL_E3123, LL_CombENV13	0.40, 0.34	4.9-7.4
	13	SCM002771.2_56900783	56900783	G/A	3.5-3.1	LW_E323	3.52	6.5
78	13	SCM002771.2_69833085	69833085	C/T	3.7-3.2	LL_E223	0.40	5.6
	13	SCM002771.2_69833922	69833922	C/G	3.4-3.2	LL_E223	0.37	5
79	13	SCM002771.2_78761785	78761785	G/T	3.5-3.0	LL_E43, LL_CombENV123	0.68, 0.63	5.3
80	13	SCM002771.2_80035604	80035604	C/T	3.4-3.0	LL_E13; E33; CombENV23	0.64	5.3
81	14	SCM002772.2_3422830	3422830	G/A	3.5-3.3	PM_14D123	7.66	4.9	Wu et al. 2013 (3.06-7.93 Mb)
82	14	SCM002772.2_8693165	8693165	A/G	3.4-3.2	LW_E1123, E323	5.90, 5.49	5.8-6.2
83	14	SCM002772.2_10285794	10285794	T/G	3.5-3.3	LW_E4123	4.12, 4.05	5.6	Zhao et al. 2006 (11.7-28.7 Mb)
84	14	SCM002772.2_12898850	12898850	G/A	3.9-3.6	LW_E1123	-4.07, -4.02	6.8	Zhao et al. 2006 (11.7-28.7 Mb)
85	14	SCM002772.2_13679559	13679559	C/T	3.9-3.6	LW_E323	3.90	7.2	Zhao et al. 2006 (11.7-28.7 Mb)
86	14	SCM002772.2_29581828	29581828	C/A	4.6-3.1	PM_14D123, PM_21D123	-9.74, -5.74	3.7-6.6	Zhao et al. 2006 (11.7-28.7 Mb); Qasim et al. 2020 (28.37-37.43 Mb)
87	14	SCM002772.2_53077839	53077839	A/G	4.2-3.9	PM_14D123	4.22	6
88	14	SCM002772.2_65359864	65359864	C/T	4.5-3.1	LL_E1123, LL_E213, LL_CombENV123	0.82; 0.72	6.6-7.6
	14	SCM002772.2_65359864	65359864	C/T	3.8-3.2	LW_E1123, LW_E3123, LW_CombENV23	6.07, 3.28	5.5-6.8
89	14	SCM002772.2_70479506	70479506	A/G	4.0-3.0	LW_E23, LW_E4123	-6.83, -6.75	6.4
90	15	SCM002773.2_9748366	9748366	T/C	3.6-3.2	LW_E4123, LW_CombENV23	4.15, 3.08	5.2-5.7
	15	SCM002773.2_9748366	9748366	T/C	4.1-3.5	PM_21D123	5.77, 3.23	4.3
91	15	SCM002773.2_10201221	10201221	C/T	7.2-3.9	LW_E3123	7.75, 6.43	7.8
92	15	SCM002773.2_29580386	29580386	A/T	3.7-3.0	LL_E33, LL_E423, LL_CombENV23	0.78, 0.60	5.1-6.0
93	15	SCM002773.2_35983051	35983051	G/A	3.9-3.1	LW_E123	2.69; 1.52	5.6
94	15	SCM002773.2_36238886	36238886	G/T	3.6-3.4	PM_21D23	-3.94	4.2
	15	SCM002773.2_36273958	36273958	A/G	3.7-3.4	PM_21D23	-3.89	4.2
95	15	SCM002773.2_38993115	38993115	A/C	3.9-3.0	LL_E1123, LL_CombENV23	0.51, 0.44	5.0-6.6
96	16	SCM002774.2_14148427	14148427	G/A	3.6-3.4	PM_21D23	6.91	4.1
97	16	SCM002774.2_22279509	22279509	A/G	3.8-3.0	LL_E4123, LL_CombENV123	-0.45, -0.28	4.9-5.7	Zhao et al. 2006 (23.18-35.47 Mb)
98	16	SCM002774.2_22321613	22321613	C/A	3.5-3.1	LL_E413, LL_CombENV1	0.39, 0.26		Zhao et al. 2006 (23.18-35.47 Mb)
99	16	SCM002774.2_22403960	22403960	A/C	4.0-3.0	LL_E4123, LL_CombENV1	-0.42, -0.27	5	Zhao et al. 2006 (23.18-35.47 Mb)
100	16	SCM002774.2_23440605	23440605	G/T	4.0-3.6	PM_21D23	-8.68	4.5	Zhao et al. 2006 (23.18-35.47 Mb)
101	16	SCM002774.2_23837210	23837210	A/T	3.4-3.1	LL_E413, LL_CombENV13	-0.36, -0.26		Zhao et al. 2006 (23.18-35.47 Mb)
102	16	SCM002774.2_25673001	25673001	G/A	3.4-3.1	LW_E2123, LW_E4123	3.33, 3.05	5.0-5.2	Zhao et al. 2006 (23.18-35.47 Mb); Wu et al. 2016 (25.8-26.47 Mb)
103	16	SCM002774.2_25678898	25678898	T/C	3.8-3.0	LL_E223, LL_E4123	0.35, 0.23	4.7-6.0	Zhao et al. 2006 (23.18-35.47 Mb); Wu et al. 2016 (25.8-26.47 Mb)
	16	SCM002774.2_25678898	25678898	T/C	5.0-3.0	LW_E2123, LW_E4123, LW_CombENV23	3.81, 2.15	4.9-7.6	Zhao et al. 2006 (23.18-35.47 Mb); Wu et al. 2016 (25.8-26.47 Mb)
104	16	SCM002774.2_25739024	25739024	T/C	3.7-3.0	LL_E1123, LL_E313, LL_E41, LL_CombENV123	0.29, 0.21	5.0-5.4	Zhao et al. 2006 (23.18-35.47 Mb); Wu et al. 2016 (25.8-26.47 Mb)
	16	SCM002774.2_25739024	25739024	T/C	10.9-3.4	LW_E323, LW_E4123, LW_CombENV123	2.78, 2.17	6.1-6.9	Zhao et al. 2006 (23.18-35.47 Mb); Wu et al. 2016 (25.8-26.47 Mb)
	16	SCM002774.2_25739024	25739024	T/C	4.0-3.8	PM_14D123	3.64	5.7	Zhao et al. 2006 (23.18-35.47 Mb); Wu et al. 2016 (25.8-26.47 Mb)
105	16	SCM002774.2_33238118	33238118	G/T	3.4-3.0	LL_E3123	-0.32	5.9	Zhao et al. 2006 (23.18-35.47 Mb) and(28.55-35.47 Mb); Wu et al. 2013 (30.28-34.59 Mb) and (34.59-36.61 Mb); Wei et al. 2016 (30.78-31.34 Mb); Qasim et al. 2020 (32.95-34.44 Mb)
	16	SCM002774.2_33238118	33238118	G/T	3.4-3.0	LW_E323	-2.91	5.8	Zhao et al. 2006 (23.18-35.47 Mb) and(28.55-35.47 Mb); Wu et al. 2013 (30.28-34.59 Mb) and (34.59-36.61 Mb); Wei et al. 2016 (30.78-31.34 Mb); Qasim et al. 2020 (32.95-34.44 Mb)
	16	SCM002774.2_33265642	33265642	G/C	3.4-3.1	LL_E3123	0.31	6.2	Zhao et al. 2006 (23.18-35.47 Mb) and(28.55-35.47 Mb); Wu et al. 2013 (30.28-34.59 Mb) and (34.59-36.61 Mb); Wei et al. 2016 (30.78-31.34 Mb); Qasim et al. 2020 (32.95-34.44 Mb)
106	16	SCM002774.2_33563646	33563646	T/A	4.0-3.0	LL_E1123, LL_E21, LL_E3123, LL_E41, LL_CombENV123	0.32, 0.25	5.4-6.0	Zhao et al. 2006 (23.18-35.47 Mb) and(28.55-35.47 Mb); Wu et al. 2013 (30.28-34.59 Mb) and (34.59-36.61 Mb); Wei et al. 2016 (30.78-31.34 Mb); Qasim et al. 2020 (32.95-34.44 Mb)
	16	SCM002774.2_33563646	33563646	T/A	3.4-3.0	LW_E1123; LW_CombENV23	2.16; 2.13	5.0-5.5	Zhao et al. 2006 (23.18-35.47 Mb) and(28.55-35.47 Mb); Wu et al. 2013 (30.28-34.59 Mb) and (34.59-36.61 Mb); Wei et al. 2016 (30.78-31.34 Mb); Qasim et al. 2020 (32.95-34.44 Mb)
	16	SCM002774.2_33563646	33563646	T/A	4.0-3.7	PM_14D123	4.06	5.7	Zhao et al. 2006 (23.18-35.47 Mb) and(28.55-35.47 Mb); Wu et al. 2013 (30.28-34.59 Mb) and (34.59-36.61 Mb); Wei et al. 2016 (30.78-31.34 Mb); Qasim et al. 2020 (32.95-34.44 Mb)
107	16	SCM002774.2_34137593	34137593	C/T	4.5-3.0	LL_E1123, LL_E2123, LL_E4123, LL_CombENV123	-0.36, -0.25	4.6-6.8	Zhao et al. 2006 (23.18-35.47 Mb) and(28.55-35.47 Mb); Wu et al. 2013 (30.28-34.59 Mb) and (34.59-36.61 Mb); Qasim et al. 2020 (32.95-34.44 Mb)
108	16	SCM002774.2_34149554	34149554	T/C	3.8-3.0	LL_E21, LL_E4123, LL_CombENV1	0.37, 0.24	4.7	Zhao et al. 2006 (23.18-35.47 Mb) and(28.55-35.47 Mb); Wu et al. 2013 (30.28-34.59 Mb) and (34.59-36.61 Mb); Qasim et al. 2020 (32.95-34.44 Mb)
109	16	SCM002774.2_39405155	39405155	A/G	4.0-3.4	LL_E3123	-0.25	6.9
	16	SCM002774.2_39405155	39405155	A/G	3.7-3.2	LW_E323	-2.23	6.3
110	17	SCM002775.2_41131780	41131780	A/G	3.5-3.2	LW_E223	-2.58	5
111	17	SCM002775.2_43529605	43529605	C/G	4.0-3.1	LL_E4123; LL_CombENV12	0.51; 0.34	5.1-6.3
112	17	SCM002775.2_49740638	49740638	C/A	3.5-3.1	LL_E423; LL_CombENV23	-0.53; -0.39	5.1-5.2
	17	SCM002775.2_49740638	49740638	C/A	3.6-3.0	LW_E4123, LW_CombENV3	-5.08, -4.98	5.7
113	17	SCM002775.2_56829232	56829232	C/G	3.7-3.0	LW_E13, LW_E43, LW_CombENV23	-2.84	5.8
114	18	SCM002776.2_7320194	7320194	G/T	4.0-3.7	PM_14D123	6.27	5.7
115	18	SCM002776.2_12692146	12692146	T/G	3.6-3.3	PM_21D23	-4.71	4
116	18	SCM002776.2_29886188	29886188	G/C	3.4-3.0	LL_E2123, LL_E423	-0.45, -0.41	4.8-5.0	Wu et al. 2013 (31.40-32.04 Mb) and (31.40-33.50 Mb)
117	18	SCM002776.2_37107013	37107013	C/T	3.8-3.5	LW_CombENV23	3.33	5.9	Wu et al. 2013 (38.19-38.47 Mb)
118	18	SCM002776.2_41681055	41681055	C/T	3.5-3.3	PM_14D123	7.14	5
119	19	SCM002777.2_15808490	15808490	G/A	3.8-3.5	LL_E3123	0.38	7.2
120	19	SCM002777.2_28925630	28925630	C/A	3.4-3.1	LW_E1123	4.64	5.7
121	19	SCM002777.2_34413846	34413846	C/T	7.0-3.2	PM_21D123	-10.25, -9.21	3.8
122	19	SCM002777.2_46851981	46851981	G/A	4.0-3.1	LL_E1123, LL_E3123, LL_E4123, LL_CombENV123	-0.84, -0.59	5.3-6.8	Zhao et al. 2006 (46.58-46.75 Mb)
123	19	SCM002777.2_48885679	48885679	C/T	5.8-3.3	LL_E1123, LL_E2123, LL_E3123, LL_E4123, LL_CombENV123	0.83, 0.52	5.8-9.2
	19	SCM002777.2_48885679	48885679	C/T	8.2-3.8	LW_E1123, LW_E2123, LW_E3123, LW_E4123, LW_CombENV123	7.60, 3.37	7.0-10.3
	19	SCM002777.2_48885679	48885679	C/T	4.6-4.3	PM_14D123	9.37	6.7
	Chra, Brassica napus chromosome number
	Allelesb, (_/_) Major allele/minor allele
	-log10 (P)c, The highest and lowest -log10 (P) value resulted from the studied environments with different GWAS models where the identified SNPs -log10 (P) value ≥3.4 by at least of the GWAS models
	Traits, Env & Modeld, Traits: LL, Lesion length; LW, Lesion width; PM_14D, Combined environment (CombENV) plant mortality at 14 days post inoculation (dpi); PM_21D, Combined environment (CombENV) plant mortality at 21 dpi; Environments: E1, Carrington 2019; E2, Landon 2019; E3, Carrington 2020; E4, Osnabrock 2020; CombENV, combined analysis across four environments; Model: superscript 1, 2 & 3 re…
	Allelic effecte, difference in mean stem lesion length (cm) between genotypes with major allele and minor allele. Positive sign indicates major allele is associated with increased lesion length (cm). Negative sign indicates that the major allele is associated with reduced lesion length (cm)
	R2 f, Percentage of phenotypic variation explained by the identified significant SNP derived from the results of MLM method
	¶ The SNP markers in light green shade present in al least two or more environment, two or more disease phenotypic traits and identified by at least two GWAS models out of the three used GWAS models (FarmCPU, MLM, GEMMA-MLM)
	Previously reported MTAs g, previously reported marker-trait-associations (MTAs) along with their physical positions from vaious QTL and GWAS-related studies which overlapped or in close proximity with the genomic regions in this study. References are listed below.
	References
		Shahoveisi, F. et al. Assessing the effect of phenotyping scoring systems and SNP calling and filtering methods on detection of QTL associated with reaction of Brassica napus to Sclerotinia sclerotiorum. PhytoFrontiersTM (2021) doi:10.1094/PHYTOFR-10-20-0029-R.
		Wu, J. et al. Identification of QTLs for resistance to sclerotinia stem rot and BnaC.IGMT5.a as a candidate gene of the major resistant QTL SRC6 in Brassica napus. PLoS One 8, 1–12 (2013).
		Wei, L. et al. Genome-wide association analysis and differential expression analysis of resistance to sclerotinia stem rot in Brassica napus. Plant Biotechnol. J. 14, 1368–1380 (2016).
		Wu, J. et al. Genome-wide association study identifies new loci for resistance to sclerotinia stem rot in Brassica napus. Front. Plant Sci. 7, 1418 (2016).
		Wu, J. et al. Co-location of QTL for sclerotinia stem rot resistance and flowering time in Brassica napus. Crop J. (2019) doi:10.1016/j.cj.2018.12.007.
		Qasim, M. U. et al. Identification of QTLs containing resistance genes for sclerotinia stem rot in Brassica napus using comparative transcriptomic studies. Front. Plant Sci. 11, 776 (2020).
		Zhao, J. et al. Quantitative trait loci for resistance to Sclerotinia sclerotiorum and its association with a homeologous non-reciprocal transposition in Brassica napus L. Theor. Appl. Genet. 112, 509–516 (2006).

## Sheet: Sheet2
Traits	Locus	Chr	SNP ID	Position (bp)	Allelesb	-log10 (P)c	Env & Modeld	Allelic effecte	R2 f
LL	1	1	SCM002759.2_1471693	1471693	A/T	4.3-3.1	E1123, E223, E423, CombENV123	-0.30, -0.22	4.8-7.0
LW		1	SCM002759.2_1471693	1471693		6.9-3.3	CombENV123	-1.97; -1.56	5.5
PM		1	SCM002759.2_1471693	1471693		4.0-3.2	PM_14D123; PM_21D23	-3.51; -3.34	3.9-5.3
LL	2	1	SCM002759.2_1766199	1766199	A/G	3.6-3.0	E2123, CombENV123	0.47, 0.37	4.6-5.6
LW	1	1	SCM002759.2_2561773	2561773	C/T	6.6-3.0	E3123, CombENV23	4.42, 1.90	4.9-12.1
LW	2	1	SCM002759.2_4235780	4235780	A/C	3.5-3.2	E2123	2.42, 2.32	5.1
LL	3	1	SCM002759.2_4239970	4239970	A/C	4.8-3.3	E2123, E423, CombENV23	-0.34; -0.25	5.4-7.3
LW		1	SCM002759.2_4239970	4239970	A/C	4.0-3.3	E2123, E4123,CombENV23	-3.26, -2.26	5.7-6.0
PM		1	SCM002759.2_5322870	5322870		3.5-3.3	PM_21D23	-6.28	3.9
PM		1	SCM002759.2_5323805	5323805		3.4-3.2	PM_21D23	-6.12	3.8
LW	3	1	SCM002759.2_5478454	5478454	C/T	3.4-3.0	E43, CombENV23	2.78	5.2
LL	4	1	SCM002759.2_11482241	11482241	C/T	3.1-3.4	E1123, E33, CombENV13	-0.28; -0.27	5.4
LW	4	1	SCM002759.2_12025515	12025515	A/G	3.5-3.3	E1123	2.35; 2.33	6.1
LW	5	1	SCM002759.2_31973754	31973754	A/C	3.5-3.2	E4123	-2.48; -2.50	5.4
LL	5	2	SCM002760.2_1865667	1865667	A/C	4.8-3.0	E223, E4123, CombENV23	-0.70, -0.43	4.5-7.7
LW	6	2	SCM002760.2_1865667	1865667	A/C	4.5-3.6	E4123, CombENV23	-4.27, -5.98	6.2-7.3
LL		2	SCM002760.2_10378033	10378033		3.5-3.3	E423	-0.28	5.3
LL	6	2	SCM002760.2_30827371	30827371	C/G	3.6-3.1	E3123	-0.22; -0.21	6.2
PM		3	SCM002761.2_660936	660936	T/A	5.7-3.5	PM_21D123	6.49, 4.85	4.3
LW	7	3	SCM002761.2_6322149	6322149	C/G	3.8-3.3	E2123	-2.70; -2.78	5.7
PM		3	SCM002761.2_8296124	8296124	G/A	3.4-3.2	PM_14D123	5.41	4.8
LW		3	SCM002761.2_11084205	11084205		3.7-3.1	E223; CombENV1	5.2; 2.4	4.9
LW		3	SCM002761.2_11191427	11191427		3.4-3.3	E213	-6.47
LL	7	3	SCM002761.2_17320071	17320071	T/A	3.8-3.1	E2123	-0.56; -0.51	4.8
LL	8	3	SCM002761.2_28225133	28225133	T/C	3.7-3.4	E3123	-0.36	7.2
LW		3	SCM002761.2_28225133	28225133		3.7-3.4	E323	-3.33991	6.7
LW	8	3	SCM002761.2_28954312	28954312	T/C	3.4-3.2	E4123	4.91; 4.76	5.3
LL	9	3	SCM002761.2_30742237	30742237	T/C	3.4-3.0	E1123, CombENV3	0.41	5.4
PM		3	SCM002761.2_31300829	31300829		3.4-3.2	PM_21D23	7.94	3.8
PM		3	SCM002761.2_31986941	31986941	G/A	3.9-3.0	PM_14D123, PM_21D23	4.43, 4.15	3.6-5.5
LL	10	3	SCM002761.2_35236913	35236913	C/A	3.5-3.2	E3123	-0.20	6.7
LW	9	3	SCM002761.2_35236913	35236913	C/A	8.7-3.6	E1123, E3123	-2.07, -1.84	6.7-8.2
LL	11	3	SCM002761.2_36170515	36170515	G/A	5.4-4.0	E1123, E3123, CombENV123	0.26, 0.23	7.0-9.9
LW	10	3	SCM002761.2_36170515	36170515	G/A	7.0-3.3	E1123, E323, CombENV123	2.24, 1.52	5.6-8.7
LL	12	4	SCM002762.2_3551539	3551539	C/T	3.4-3.0	E4123, CombENV123	0.61, 0.45	4.8-5.2
PM		4	SCM002762.2_16168004	16168004	G/C	3.5-3.1	PM_14D13, PM_21D23	4.07, 3.79	4
LL	13	4	SCM002762.2_20212672	20212672	T/A	4.5-3.0	E3123,CombENV13	-0.56; -0.44	5.0-8.6
PM		4	SCM002762.2_20789292	20789292		3.7-3.1	PM_21D23	-3.32	3.7
PM		4	SCM002762.2_20860192	20860192		4.0-3.7	PM_21D23	4.11	4.6
LW		5	SCM002763.2_1779846	1779846		4.4-3.1	E13; E323; CombENV23	-2.47; -2.15	5.2-7.1
LL	14	5	SCM002763.2_15914063	15914063	G/A	5.2-3.0	E2123, E4123, CombENV123	-0.59; -0.33	5.0-8.0
LW	11	5	SCM002763.2_15914063	15914063	G/A	5.1-3.3	E2123, E4123, CombENV23	-5.49, -3.18	5.5-7.8
LW		5	SCM002763.2_15924240	15924240		3.5-3.2	E213	2.73
LL	15	5	SCM002763.2_16279322	16279322	A/C	3.7-3.1	E3123, CombENV23	-0.39; -0.34	5.1-7.2
LW	12	5	SCM002763.2_16279322	16279322	A/C	5.8-3.0	E113, E3123,CombENV123	-3.89, -2.66	5.4-8.0
LW	13	5	SCM002763.2_24009625	24009625	C/G	3.5-3.2	E1123	2.69; 2.58	6
LL	16	5	SCM002763.2_28142332	28142332	A/G	3.9-3.1	E2123	0.24; 0.27	4.7
LL	17	5	SCM002763.2_28608175	28608175	A/G	3.5-3.3	E2123	0.42; 0.38	5.1
LW	14	5	SCM002763.2_28608175	28608175	A/G	3.5-3.0	E2123, CombENV3	4.16	5.2
PM		6	SCM002764.2_8266872	8266872		3.5-3.0	PM_21D23	5.36	3.6
PM		6	SCM002764.2_24985572	24985572		3.4-3.2	PM_21D23	3.20	3.8
LL	18	6	SCM002764.2_25241979	25241979	C/A	3.3-3.0	E113, E323, CombENV123	-0.47; -0.45	5.0-5.9
LW	15	6	SCM002764.2_25241979	25241979	C/A	4.5-3.2	E1123, E3123, CombENV123	-5.10, -3.15	5.2-8.0
LW	16	6	SCM002764.2_29348402	29348402	A/C	5.3-3.1	E21, E413, CombENV123	-2.60, -1.43	5.5
LW		6	SCM002764.2_33502340	33502340		3.6-3.2	E113; E33	-3.20
LW		6	SCM002764.2_33622715	33622715		3.4-3.0	E23; E43; CombENV23	1.77	5.3
LL	19	7	SCM002765.2_25991221	25991221	G/C	3.7-3.1	E1123, E2123, CombENV3	-0.63; -0.51	5.4-5.5
LL	20	8	SCM002766.2_1982656	1982656	G/C	4.6-3.1	E3123, E4123, CombENV123	-0.57; -0.38	7.0-7.5
LL	21	8	SCM002766.2_13657808	13657808	T/G	3.5-3.0	E3123	-0.41	6
LW		8	SCM002766.2_13657808	13657808		3.6-3.1	E323	-3.76479	5.9
LL	22	8	SCM002766.2_13864870	13864870	A/G	3.7-3.1	E2123, E4123, CombENV123	0.67, 0.47	5.2-5.7
PM		8	SCM002766.2_17407234	17407234		3.5-3.3	PM_21D23	-10.6634	4
LW		8	SCM002766.2_20621551	20621551		3.6-3.4	E223	2.63641	5.4
LW		8	SCM002766.2_20760271	20760271		3.9-3.2	E323; CombENV23	2.35; 2.06	5.4-7.2
PM		8	SCM002766.2_20760271	20760271	G/C	4.3-3.6	PM_14D123, PM_21D23	4.01, 3.82	5.0-5.4
PM		8	SCM002766.2_22920266	22920266	T/C	3.8-3.3	PM_14D3, PM_21D23	7.24	4.4
PM		9	SCM002767.2_35588232	35588232	T/C	6.8-3.9	PM_21D123	-7.47, -5.64	4.8
PM		9	SCM002767.2_36527400	36527400	T/C	3.8-3.1	PM_14D123, PM_21D3	-5.83	5.4
LL	23	9	SCM002767.2_37664281	37664281	A/G	3.9-3.7	E4123	-0.34	6.2
LL	24	9	SCM002767.2_37671479	37671479	G/A	3.6-3.1	E1123, E21	-0.31; -0.27	5.9
LW	17	9	SCM002767.2_37671479	37671479	G/A	4.0-3.2	E1123, CombENV3	-2.60; -2.64	6.9
LL	25	9	SCM002767.2_39128782	39128782	T/C	3.6-3.2	E1123, CombENV123	-0.60; -0.56	5.4-6.0
LL	26	9	SCM002767.2_43041855	43041855	C/T	3.8-3.5	E3123	0.65	7.1
PM		9	SCM002767.2_43331392	43331392	C/A	3.4-3.0	PM_14D123, PM_21D23	-3.43, -3.30	3.6-4.6
PM		9	SCM002767.2_43506803	43506803		3.4-3.1	PM_21D23	3.26	3.7
LL	27	9	SCM002767.2_45297735	45297735	T/C	4.0-3.3	E2123, E413, CombENV2	-0.47; -0.33	5.1-6.1
LW		9	SCM002767.2_45297735	45297735		3.4-3.1	CombENV23	-2.95	5.1
LL	28	9	SCM002767.2_45841268	45841268	A/T	3.5-3.0	E3123, CombENV13	0.44, 0.43	6
LW	18	9	SCM002767.2_45841268	45841268	A/T	5.9-3.8	E3123	4.58; 3.56	7.6
LW	19	10	SCM002768.2_2190513	2190513	A/C	3.5-3.1	E1123, E323	3.57; 3.41	6
PM		10	SCM002768.2_4273597	4273597	G/A	4.0-3.1	PM_14D13, PM_21D23	-11.29, -9.48	4.5
PM		10	SCM002768.2_5144576	5144576	T/C	7.4-3.2	PM_14D123, PM_21D123	5.74, 4.04	4.7-7.7
LW		10	SCM002768.2_12144744	12144744		3.4-3.2	E323	2.62	6.3
LW		10	SCM002768.2_21099405	21099405		3.5-3.0	E213; E413	2.89; 2.47
LL	29	11	SCM002769.2_6223969	6223969	T/C	4.4-3.3	E1123, E3123, CombENV123	-0.45; -0.38	6.0-7.3
LW		11	SCM002769.2_6223969	6223969		3.4-3.1	E1123; CombENV1	-3.43	5.7
PM		11	SCM002769.2_6223969	6223969	T/C	3.5-3.3	PM_14D123	-6.05	5
LL	30	11	SCM002769.2_46192098	46192098	T/C	4.2-3.0	E2123, E423, CombENV23	-0.74; -0.52	4.9-6.4
LW	20	11	SCM002769.2_46192098	46192098	T/C	3.9-3.0	E2123, CombENV23	-7.37, -4.75	5.0-5.8
PM		11	SCM002769.2_46192098	46192098	T/C	4.1-3.0	PM_14D123, PM_21D123	-9.69, -5.60	4.4-4.8
LL	31	12	SCM002770.2_25096010	25096010	A/T	3.6-3.0	E3123, CombENV1	0.50, 0.49	6.1
LW	21	12	SCM002770.2_25096010	25096010	A/T	3.8-3.1	E1123, E323; CombENV3	4.70, 4.50	5.9-6.2
LL	32	12	SCM002770.2_32020747	32020747	A/G	4.0-3.0	E2123, E413, CombENV123	0.46, 0.34	5.1-6.0
LW	22	12	SCM002770.2_32020747	32020747	A/G	4.3-3.0	E1123, E21, E4123, CombENV123	4.04, 1.80	4.9-6.2
LW	23	12	SCM002770.2_43963414	43963414	A/T	3.6-3.0	E213, E4123	-3.02; -2.71	5.1
LW		12	SCM002770.2_44006308	44006308		3.5-3.1	E213; E413	2.88; 2.51
LW		12	SCM002770.2_44012322	44012322	C/T	3.6-3.0	E4123, CombENV1	-2.78, -2.68	5.5
LW		12	SCM002770.2_59170961	59170961		3.7-3.4	E323	-5.146	6.8
LL	33	12	SCM002770.2_62791159	62791159	T/C	3.6-3.3	E3123	-0.35; -0.34	7
LW		12	SCM002770.2_62791159	62791159		3.7-3.4	E323	-3.20401	6.7
PM		13	SCM002771.2_7740873	7740873	C/A	3.5-3.0	PM_14D13, PM_21D23	4.19, 3.97	3.7
LL	34	13	SCM002771.2_7893201	7893201	C/G	5.0-3.1	E2123, E4123, CombENV13	0.78, 0.47	5.7-7.9
LW	24	13	SCM002771.2_7893201	7893201	C/G	5.0-3.5	E2123, E4123, CombENV23	7.51, 4.54	6.0-7.1
LL	35	13	SCM002771.2_22853068	22853068	G/A	3.7-3.0	E2123, E4123, CombENV123	-0.50; -0.38	4.9-5.3
LW	25	13	SCM002771.2_22853068	22853068	G/A	3.4-3.0	E413, CombENV23	-4.24, -3.34	4.9
LW	26	13	SCM002771.2_27877818	27877818	G/C	3.4-3.2	E4123	-5.67; -5.77	5.4
LL	36	13	SCM002771.2_45250459	45250459	T/G	3.8-3.5	E1123	0.26	6.2
LW	27	13	SCM002771.2_45250459	45250459	T/G	3.4-3.2	E1123	2.22; 2.20	5.9
LW	28	13	SCM002771.2_48097242	48097242	G/A	3.9-3.1	E1123, CombENV23	-4.19, -3.81	5.2-6.9
LL	37	13	SCM002771.2_56900783	56900783	G/A	3.8-3.0	E1123, E3123, CombENV13	0.40, 0.34	4.9-7.4
LW		13	SCM002771.2_56900783	56900783		3.5-3.1	E323	3.52	6.5
LL		13	SCM002771.2_69833085	69833085		3.7-3.2	E223	0.396464	5.6
LL	38	13	SCM002771.2_78761785	78761785	G/T	3.5-3.0	E43, CombENV123	0.68, 0.63	5.3
LL		13	SCM002771.2_80035604	80035604		3.4-3.0	E13; E33; CombENV23	0.637825	5.3
PM		14	SCM002772.2_3422830	3422830	G/A	3.5-3.3	PM_14D123	7.66	4.9
LW	29	14	SCM002772.2_8693165	8693165	A/G	3.4-3.2	E1123, E323	5.90, 5.49	5.8-6.2
LW	30	14	SCM002772.2_10285794	10285794	T/G	3.5-3.3	E4123	4.12, 4.05	5.6
LW	31	14	SCM002772.2_12898850	12898850	G/A	3.9-3.6	E1123	-4.07, -4.02	6.8
LW		14	SCM002772.2_13679559	13679559		3.9-3.6	E323	3.90	7.2
PM		14	SCM002772.2_29581828	29581828	C/A	4.6-3.1	PM_14D123, PM_21D123	-9.74, -5.74	3.7-6.6
PM		14	SCM002772.2_53077839	53077839	A/G	4.2-3.9	PM_14D123	4.22	6
LL	39	14	SCM002772.2_65359864	65359864	C/T	4.5-3.1	E1123, E213, CombENV123	0.82; 0.72	6.6-7.6
LW	32	14	SCM002772.2_65359864	65359864	C/T	3.8-3.2	E1123, E3123, CombENV23	6.07, 3.28	5.5-6.8
LW	33	14	SCM002772.2_70479506	70479506	A/G	4.0-3.0	E23, E4123	-6.83, -6.75	6.4
LW	34	15	SCM002773.2_9748366	9748366	T/C	3.6-3.2	E4123, CombENV23	4.15, 3.08	5.2-5.7
PM		15	SCM002773.2_9748366	9748366	T/C	4.1-3.5	PM_21D123	5.77, 3.23	4.3
LW	35	15	SCM002773.2_10201221	10201221	C/T	7.2-3.9	E3123	7.75, 6.43	7.8
LL	40	15	SCM002773.2_29580386	29580386	A/T	3.7-3.0	E33, E423, CombENV23	0.78, 0.60	5.1-6.0
LW		15	SCM002773.2_35983051	35983051		3.9-3.1	E123	2.69; 1.52	5.6
PM		15	SCM002773.2_36238886	36238886		3.6-3.4	PM_21D23	-3.93864	4.2
PM		15	SCM002773.2_36273958	36273958		3.7-3.4	PM_21D23	-3.89154	4.2
LL	41	15	SCM002773.2_38993115	38993115	A/C	3.9-3.0	E1123, CombENV23	0.51, 0.44	5.0-6.6
PM		16	SCM002774.2_14148427	14148427		3.6-3.4	PM_21D23	6.91	4.1
LL	42	16	SCM002774.2_22279509	22279509	A/G	3.8-3.0	E4123, CombENV123	-0.45, -0.28	4.9-5.7
LL	43	16	SCM002774.2_22321613	22321613	C/A	3.5-3.1	E413, CombENV1	0.39, 0.26
LL	44	16	SCM002774.2_22403960	22403960	A/C	4.0-3.0	E4123, CombENV1	-0.42, -0.27	5
PM		16	SCM002774.2_23440605	23440605		4.0-3.6	PM_21D23	-8.68	4.5
LL	45	16	SCM002774.2_23837210	23837210	A/T	3.4-3.1	E413, CombENV13	-0.36, -0.26
LW	36	16	SCM002774.2_25673001	25673001	G/A	3.4-3.1	E2123, E4123	3.33, 3.05	5.0-5.2
LL	46	16	SCM002774.2_25678898	25678898	T/C	3.8-3.0	E223, E4123	0.35, 0.23	4.7-6.0
LW	37	16	SCM002774.2_25678898	25678898	T/C	5.0-3.0	E2123, E4123, CombENV23	3.81, 2.15	4.9-7.6
LL	47	16	SCM002774.2_25739024	25739024	T/C	3.7-3.0	E1123, E313, E41, CombENV123	0.29, 0.21	5.0-5.4
LW	38	16	SCM002774.2_25739024	25739024	T/C	10.9-3.4	E323, E4123, CombENV123	2.78, 2.17	6.1-6.9
PM		16	SCM002774.2_25739024	25739024	T/C	4.0-3.8	PM_14D123	3.64	5.7
LL	48	16	SCM002774.2_33238118	33238118	G/T	3.4-3.0	E3123	-0.32	5.9
LW		16	SCM002774.2_33238118	33238118		3.4-3.0	E323	-2.91	5.8
LL		16	SCM002774.2_33265642	33265642	G/C	3.4-3.1	E3123	0.31	6.2
LL	49	16	SCM002774.2_33563646	33563646	T/A	4.0-3.0	E1123,E21,E3123, E41, CombENV123	0.32, 0.25	5.4-6.0
LW		16	SCM002774.2_33563646	33563646		3.4-3.0	E1123; CombENV23	2.16; 2.13	5.0-5.5
PM		16	SCM002774.2_33563646	33563646	T/A	4.0-3.7	PM_14D123	4.06	5.7
LL	50	16	SCM002774.2_34137593	34137593	C/T	4.5-3.0	E1123, E2123, E4123, CombENV123	-0.36, -0.25	4.6-6.8
LL	51	16	SCM002774.2_34149554	34149554	T/C	3.8-3.0	E21, E4123, CombENV1	0.37, 0.24	4.7
LL	52	16	SCM002774.2_39405155	39405155	A/G	4.0-3.4	E3123	-0.25	6.9
LW		16	SCM002774.2_39405155	39405155		3.7-3.2	E323	-2.23	6.3
LW		17	SCM002775.2_41131780	41131780		3.5-3.2	E223	-2.58	5
LL		17	SCM002775.2_43529605	43529605		4.0-3.1	E4123; CombENV12	0.51; 0.34	5.1-6.3
LL		17	SCM002775.2_49740638	49740638		3.5-3.1	E423; CombENV23	-0.53; -0.39	5.1-5.2
LW	39	17	SCM002775.2_49740638	49740638	C/A	3.6-3.0	E4123, CombENV3	-5.08, -4.98	5.7
LW	40	17	SCM002775.2_56829232	56829232	C/G	3.7-3.0	E13, E43, CombENV23	-2.84	5.8
PM		18	SCM002776.2_7320194	7320194	G/T	4.0-3.7	PM_14D123	6.27	5.7
PM		18	SCM002776.2_12692146	12692146		3.6-3.3	PM_21D23	-4.71	4
LL	53	18	SCM002776.2_29886188	29886188	G/C	3.4-3.0	E2123, E423	-0.45, -0.41	4.8-5.0
LW	41	18	SCM002776.2_37107013	37107013	C/T	3.8-3.5	CombENV23	3.33	5.9
PM		18	SCM002776.2_41681055	41681055	C/T	3.5-3.3	PM_14D123	7.14	5
LL	54	19	SCM002777.2_15808490	15808490	G/A	3.8-3.5	E3123	0.38	7.2
LW	42	19	SCM002777.2_28925630	28925630	C/A	3.4-3.1	E1123	4.64	5.7
PM		19	SCM002777.2_34413846	34413846	C/T	7.0-3.2	PM_21D123	-10.25, -9.21	3.8
LL	55	19	SCM002777.2_46851981	46851981	G/A	4.0-3.1	E1123, E3123, E4123, CombENV123	-0.84, -0.59	5.3-6.8
LL	56	19	SCM002777.2_48885679	48885679	C/T	5.8-3.3	E1123, E2123, E3123, E4123, CombENV123	0.83, 0.52	5.8-9.2
LW	43	19	SCM002777.2_48885679	48885679	C/T	8.2-3.8	E1123, E2123, E3123, E4123, CombENV123	7.60, 3.37	7.0-10.3
PM		19	SCM002777.2_48885679	48885679	C/T	4.6-4.3	PM_14D123	9.37	6.7
LL			SCM002759.2_5478454	5478454		3.5-3.3	E223	0.38	5.1
LL			SCM002771.2_69833922	69833922		3.4-3.2	E223	0.367487	5
