# Supplementary material for: Genome-Wide Association Mapping and Genomic Prediction for Adult Stage Sclerotinia Stem Rot Resistance in Brassica Napus (L) Under Field Environments
Source: Research Square preprint supplement (doi:10.21203/rs.3.rs-589440/v1), 2021-06-17
Supplement: Supplementary file 2 [file 99a9f59e8eb7bf4c0df6adc3.xlsx]

## Sheet: Sheet1
Supplementary Table S7. Candidate genes for different sclerotinia stem rot resistance traits within 50 kb region at either side of the significant markers
Gene symbol and ID	Chrom_Markers	Chromosome	Traits, Env & Modela	Gene Start	Gene End	Marker distance from gene (kb)b	AT Equivalent	Symbol (TAIR)	Gene Annotation/Gene Description	GO biological Function (TAIR)
LOC106353725	SCM002759.2_1471693	1	LL_E1123, LL_E223, LL_E423, LL_CombENV123; LW_CombENV123, PM_14D123; PM_21D23	1499303	1503027	27.6	AT4G36690.1	ATU2AF65A	splicing factor U2af large subunit A	defense response to bacterium
LOC106349418	SCM002759.2_1766199	1	LL_E2123, LL_CombENV123	1719359	1723770	-46.8	AT5G17880.1	CSA1	disease resistance-like protein CSA1	defense response to bacterium, signal transduction
LOC106349225	SCM002759.2_1766199	1	LL_E2123, LL_CombENV123	1728198	1733312	-38.0	AT5G45260.1	RRS1, ATWRKY52, SLH1	disease resistance protein RRS1-like	cell death, defense response
LOC106348260	SCM002759.2_1766199	1	LL_E2123, LL_CombENV123	1781241	1783781	15.0	AT4G36010.1	………….	thaumatin-like protein 1b	defense response
LOC106347663	SCM002759.2_1766199	1	LL_E2123, LL_CombENV123	1808984	1812440	42.8	………..	………….	la-related protein 1C-like	response to jasmonic acid; response to salicylic acid Source: UniProtKB
LOC106364078	SCM002759.2_11482241	1	LL_E1123, LL_E33, LL_CombENV13	11438575	11439783	-43.7	AT4G15400.1	BIA1	BAHD acyltransferase BIA1-like	brassinosteroid mediated signaling pathway
LOC106364076	SCM002759.2_11482241	1	LL_E1123, LL_E33, LL_CombENV13	11454113	11456305	-28.1	AT5G39580.1	PRX62	probable peroxidase 61	defense response to fungus
LOC106364075	SCM002759.2_11482241	1	LL_E1123, LL_E33, LL_CombENV13	11459346	11460969	-22.9	AT3G15356.1	……………	acidic endochitinase	cellular response to chitin, cellular response to jasmonic acid stimulus, response to wounding
LOC106364071	SCM002759.2_11482241	1	LL_E1123, LL_E33, LL_CombENV13	11475808	11477646	-6.4	AT5G24110.1	ATWRKY30	probable WRKY transcription factor 30	response to hydrogen peroxide, response to salicylic acid
LOC106366011	SCM002759.2_11482241	1	LL_E1123, LL_E33, LL_CombENV13	11527410	11529398	45.2	……………..	…………..	glucan endo-1,3-beta-glucosidase-like	defense response Source: UniProtKB-KW
LOC106428331	SCM002760.2_1865667	2	LL_E223, LL_E4123, LL_CombENV23; LW_E4123, LW_CombENV123	1893240	1898550	27.6	AT1G18870.1	ATICS2	isochorismate synthase 2, chloroplastic-like	salicylic acid biosynthetic process, phylloquinone biosynthetic process (TAIR); defense response Source: UniProtKB-KW
LOC106431790	SCM002760.2_1865667	2	LL_E223, LL_E4123, LL_CombENV23; LW_E4123, LW_CombENV123	1935169	1936570	49.5	AT5G01900.1	ATWRKY62	probable WRKY transcription factor 62	salicylic acid mediated signaling pathway; defense response to bacterium
LOC106440304	SCM002761.2_36170515	3	LL_E1123, LL_E3123, LL_CombENV123; LW_E1123, LW_E3123, LW_CombENV123	36128498	36129586	-42	AT3G05800.1	AIF1, ATBS1	transcription factor bHLH147-like	brassinosteroid mediated signaling pathway
LOC106450030	SCM002762.2_16168004	4	PM_14D13, PM_21D23	16156154	16161499	-11.9	AT2G19190.1	SIRK, FRK1	probable leucine-rich repeat receptor-like protein kinase At2g28990	defense response to bacterium
LOC106450029	SCM002762.2_16168004	4	PM_14D13, PM_21D23	16162571	16166325	-5.4	AT1G51890.1	……………..	probable LRR receptor-like serine/threonine-protein kinase At2g28960	defense response to bacterium, protein phosphorylation
LOC106450027	SCM002762.2_16168004	4	PM_14D13, PM_21D23	16181666	16184361	13.7	AT2G29060.1	……………..	scarecrow-like protein 33	response to chitin
LOC106447446	SCM002762.2_20212672	4	LL_E3123,LL_CombENV13	20185538	20187007	-27.1	AT2G40000.1	ATHSPRO2	nematode resistance protein-like HSPRO2	response to oxidative stress, response to salicylic acid, defense response to bacterium
LOC106447447	SCM002762.2_20212672	4	LL_E3123,LL_CombENV13	20199950	20201634	-12.7	AT5G67160.1	EPS1	protein ENHANCED PSEUDOMONAS SUSCEPTIBILTY 1-like	regulation of defense response to fungus, response to jasmonic acid, salicylic acid biosynthetic process
LOC106447451	SCM002762.2_20212672	4	LL_E3123,LL_CombENV13	20207978	20210693	-4.7	AT2G39940.1	COI1	coronatine-insensitive protein 1-like	defense response, defense response to fungus, jasmonic acid mediated signaling pathway, response to wounding
LOC106447450	SCM002762.2_20212672	4	LL_E3123,LL_CombENV13	20211173	20214039	-1.5	AT2G39940.1	COI1	coronatine-insensitive protein 1-like	defense response, defense response to fungus, jasmonic acid mediated signaling pathway, response to wounding
BNAA05G15190D	SCM002763.2_15914063	5	LL_E2123, LL_E4123, LL_CombENV123;LW_E2123, LW_E4123, LW_CombENV123	15898435	15899202	-15.6	………….	…………..	stress-response A/B barrel domain-containing protein DABB1	defense response to fungus, incompatible interaction Source: TAIR
LOC106415470	SCM002763.2_28608175	5	LL_E2123; LW_E2123, LW_CombENV3	28612323	28613998	4.1	AT4G27320.1	ATPHOS34, PHOS34, USP21	universal stress protein PHOS34-like	response to molecule of fungal origin
LOC106351996	SCM002764.2_25241979	6	LL_E113, LL_E323, LL_CombENV123; LW_E1123, LW_E3123, LW_CombENV123	25283131	25284578	41.1	AT5G24400.1	PGL3	probable 6-phosphogluconolactonase 3	cellular response to redox state, defense response to oomycetes, defense response to bacterium
LOC106348257	SCM002764.2_25241979	6	LL_E113, LL_E323, LL_CombENV123; LW_E1123, LW_E3123, LW_CombENV123	25290310	25291636	48.3	AT5G24400.1	PGL3	probable 6-phosphogluconolactonase 3	cellular response to redox state, defense response to oomycetes, defense response to bacterium
LOC106408214	SCM002764.2_29348402	6	LW_E21, LW_E413, LW_CombENV123	29363423	29367979	15	AT5G47910.1	ATRBOHD, DELT1, RBOHD	respiratory burst oxidase homolog protein D-like	defense response, defense response to fungus, negative regulation of programmed cell death, reactive oxygen species metabolic process, response to wounding
LOC106411656	SCM002767.2_36527400	9	PM_14D123, PM_21D3	36482005	36483421	-45.4	AT4G28110.1	ATMYB41, MYB41	transcription factor MYB41	response to chitin
LOC106415606	SCM002767.2_36527400	9	PM_14D123, PM_21D3	36550591	36553539	23.3	AT3G61440.1	ARATH, BSAS3, CYSC1	bifunctional L-3-cyanoalanine synthase/cysteine synthase C1, mitochondrial-like	immune response
LOC106416331	SCM002767.2_36527400	9	PM_14D123, PM_21D3	36561397	36562160	34	AT3G61460.1	BRH1	E3 ubiquitin-protein ligase RHA1B	response to brassinosteroid, response to chitin
LOC106368555	SCM002767.2_37671479	9	LL_E1123, LL_E21; LW_E1123, LW_CombENV3	37704478	37706397	33	AT2G25620.1	ATDBP1	probable protein phosphatase 2C 22	regulation of defense response to virus
LOC106365129	SCM002767.2_37671479	9	LL_E1123, LL_E21; LW_E1123, LW_CombENV3	37711755	37713768	40.3	AT5G59270.1	LECRK-II.2	putative L-type lectin-domain containing receptor kinase II.2	defense response to oomycetes; defense response to bacterium
LOC106363673	SCM002767.2_37671479	9	LL_E1123, LL_E21; LW_E1123, LW_CombENV3	37719873	37720445	48.4	AT5G27420.1	ATL31, CNI1	NEP1-interacting protein-like 2	defense response to other organism, response to chitin, defense response to bacterium
LOC106399775	SCM002767.2_43331392	9	PM_14D123, PM_21D23	43346711	43347906	15.3	AT1G02930.1	ATGST1, ATGSTF3, ATGSTF6	glutathione S-transferase F6-like	response to oxidative stress, toxin catabolic process
LOC106369308	SCM002767.2_45841268	9	LL_E3123, LL_CombENV1; LW_E3123	45883809	45885624	42.5	AT1G09340.1	CRB, CSP41B	chloroplast stem-loop binding protein of 41 kDa a, chloroplastic	response to wounding
LOC106371170	SCM002768.2_2190513	10	LW_E1123, LW_E323	2187515	2192854	-3	AT1G05630.1	5PTASE13, AT5PTASE13	type I inositol polyphosphate 5-phosphatase 13-like	response to wounding
LOC106370828	SCM002768.2_5144576	10	PM_14D123, PM_21D123	5111230	5115442	-33.3	AT1G02120.1	VAD1, VASCULAR ASSOCIATED DEATH1	protein VASCULAR ASSOCIATED DEATH 1, chloroplastic	defense response to bacterium, negative regulation of programmed cell death, response to ethylene, response to salicylic acid
LOC106418377	SCM002769.2_6223969	11	LL_E1123, LL_E3123, LL_CombENV123; LW_E1123, LW_CombENV1; PM_14D123	6193012	6195063	-31	AT1G61850.1	PLAI	patatin-like protein 8	jasmonic acid biosynthetic process, response to fungus
LOC106416990	SCM002769.2_6223969	11	LL_E1123, LL_E3123, LL_CombENV123; LW_E1123, LW_CombENV1; PM_14D123	6195174	6196644	-28.8	AT1G61850.1	PLAI	patatin-like protein 8	jasmonic acid biosynthetic process, response to fungus
LOC106435207	SCM002769.2_46192098	11	LL_E2123, LL_E423, LL_CombENV23 ; LW_E2123, LW_CombENV23; PM_14D123, PM_21D123	46265816	46269552,	73.7	AT3G17860.1	JAI3, TIFY6B	protein TIFY 6B-like	regulation of defense response, regulation of jasmonic acid mediated signaling pathway, response to wounding
LOC106418114	SCM002771.2_7740873	13	PM_14D13, PM_21D23	7714428	7720257	-26.4	AT2G01980.1	ATNHX7, ATSOS1	sodium/hydrogen exchanger 7-like	response to hydrogen peroxide, response to oxidative stress, response to reactive oxygen species
LOC111198287	SCM002771.2_7740873	13	PM_14D13, PM_21D23	7723160	7727242	-17.7	AT2G01980.1	ATNHX7, ATSOS1	sodium/hydrogen exchanger 7-like	response to hydrogen peroxide, response to oxidative stress, response to reactive oxygen species
LOC106420603	SCM002771.2_22853068	13	LL_E2123, LL_E4123, LL_BLUP123; LW_E413, LW_BLUP123	22848383	22850846	-4.7	AT2G39660.1	BIK1	serine/threonine-protein kinase BIK1-like	defense response to fungus, pattern recognition receptor signaling pathway
LOC106420698	SCM002771.2_22853068	13	LL_E2123, LL_E4123, LL_CombENV123; LW_E413, LW_CombENV23	22873629	22876257	20.6	AT2G39730.1	RCA	ribulose bisphosphate carboxylase/oxygenase activase, chloroplastic-like	response to jasmonic acid
LOC111203738	SCM002771.2_48097242	13	LW_E1123, LW_CombENV23	48112751	48114493	15.5	AT2G18060.1	ANAC037, VND1	NAC domain-containing protein 37-like	response to chitin
LOC106427438	SCM002771.2_78761785	13	LL_E43, LL_CombENV123	78722037	78722999	-39.7	AT1G51700.1	ADOF1, DOF1	dof zinc finger protein DOF1.7	response to chitin
LOC106429730	SCM002772.2_29581828	14	PM_14D123, PM_21D123	29619849	29621392	38	AT1G61120.1	GES, TPS04	(E,E)-geranyllinalool synthase-like	response to jasmonic acid, response to bacterium, response to wounding
LOC106429715	SCM002772.2_29581828	14	PM_14D123, PM_21D123	29591305	29597616	9.5	AT1G61120.1	GES, TPS04	(E,E)-geranyllinalool synthase-like	response to jasmonic acid, response to bacterium, response to wounding
LOC106403148	SCM002772.2_65359864	14	LL_E1123, LL_E213, LL_BLUP123; LW_E1123, LW_E3123, LW_BLUP123	65337976	65340100	-21.9	AT3G49120.1	ATPRX34	peroxidase C3	defense response, defense response to fungus, pattern recognition receptor signaling pathway
LOC111205825	SCM002772.2_65359864	14	LL_E1123, LL_E213, LL_CombENV123; LW_E1123, LW_E3123, LW_CombENV23	65344104	65346114	-15.8	AT3G49120.1	ATPRX34	peroxidase C3-like	defense response, defense response to fungus, pattern recognition receptor signaling pathway
LOC106402880	SCM002772.2_65359864	14	LL_E1123, LL_E213, LL_CombENV123; LW_E1123, LW_E3123, LW_CombENV23	65351289	65353101	-8.6	AT3G49120.1	ATPRX34	peroxidase C3	defense response, defense response to fungus, pattern recognition receptor signaling pathway
LOC106402879	SCM002772.2_65359864	14	LL_E1123, LL_E213, LL_CombENV123; LW_E1123, LW_E3123, LW_CombENV23	65355287	65357074	-4.6	AT3G49120.1	ATPRX34	peroxidase C3-like	defense response, defense response to fungus, pattern recognition receptor signaling pathway,
LOC106405881	SCM002772.2_65359864	14	LL_E1123, LL_E213, LL_CombENV123; LW_E1123, LW_E3123, LW_CombENV23	65366991	65369073	7.1	AT2G38470.1	ATWRKY33	probable WRKY transcription factor 33	defense response to fungus, response to chitin, systemic acquired resistance, camalexin biosynthetic process
LOC106406388	SCM002772.2_65359864	14	LL_E1123, LL_E213, LL_CombENV123; LW_E1123, LW_E3123, LW_CombENV23	65400425	65401371	40.6	AT2G38530.1	ATLTPI-5	non-specific lipid-transfer protein A	programmed cell death
LOC106392319	SCM002772.2_70479506	14	LW_E23, LW_E4123	70474430	70481001	-5.1	AT4G27320.1	ATPHOS34, PHOS34, USP21	universal stress protein PHOS34-like	response to molecule of fungal origin
LOC106435386	SCM002773.2_38993115	15	LL_E1123, LL_CombENV23	39037941	39039005	44.8	…………..	……………	protein EMSY-LIKE 1-like	defense response to fungus Source: UniProtKB
LOC106435387	SCM002773.2_38993115	15	LL_E1123, LL_CombENV23	38955129	38956867	-38	AT3G12500.1	ATHCHIB	endochitinase CH25	defense response to fungus, jasmonic acid and ethylene-dependent systemic resistance
LOC106435413	SCM002773.2_38993115	15	LL_E1123, LL_CombENV23	38957383	38958591	-35.7	AT3G12490.2	ATCYS6	cysteine proteinase inhibitor 6-like	response to oxidative stress
LOC106435414	SCM002773.2_38993115	15	LL_E1123, LL_CombENV23	38970181	38971516	-22.9	…………..	……………	nascent polypeptide-associated complex subunit alpha-like protein 1	wound healing Source: BHF-UCL
LOC106411532	SCM002774.2_22279509	16	LL_E4123, LL_CombENV123	22300887	22302792	21.4	…………..	……………	aldehyde oxidase GLOX-like	defense response to fungus Source: UniProtKB
LOC106410769	SCM002774.2_22403960	16	LL_E4123, LL_CombENV1	22398197	22399722	-5.8	AT5G54430.1	ATPHOS32, PHOS32	universal stress protein PHOS34	response to molecule of fungal origin
LOC106406682	SCM002774.2_23837210	16	LL_E413, LL_CombENV13	23804190	23806099	-33	AT3G56400.1	ATWRKY70	probable WRKY transcription factor 70	indole glucosinolate biosynthetic process, induced systemic resistance, response to chitin, jasmonic acid mediated signaling pathway
LOC106428228	SCM002774.2_25678898	16	LL_E223, LL_E4123; LW_E2123, LW_E4123, LW_CombENV23	25722157	25724306	43.3	……………..	………………..	F-box/LRR-repeat protein At3g59200-like	defense response to oomycetes
LOC106426248	SCM002774.2_33563646	16	LL_E1123, LL_E21, LL_E3123, LL_E41, LL_CombENV123; LW_E1123, LW_CombENV23; PM_14D123	33570406	33572323	6.8	AT2G37710.1	LECRK-IV.1, RLK	L-type lectin-domain containing receptor kinase IV.2-like	response to salicylic acid, defense response to oomycetes, defense response to bacterium
LOC106352125	SCM002774.2_34137593	16	LL_E1123, LL_E2123, LL_E4123, LL_CombENV123	34171494	34172759	33.9	AT1G66700.1	PXMT1	paraxanthine methyltransferase 1	response to molecule of fungal origin, response to salicylic acid
LOC106409984	SCM002775.2_56829232	17	LW_E13, LW_E43, LW_CombENV23	56810590	56811524	-18.6	AT2G14610.1	ATCAPE9, ATPR1, PR 1	pathogenesis-related protein PR-1	defense response, systemic acquired resistance
LOC106359636	SCM002776.2_29886188	18	LL_E2123, LL_E423	29846232	29850055	-40	AT3G55970.1	ATJRG21, JAO3	probable 2-oxoglutarate-dependent dioxygenase JRG21	regulation of jasmonic acid mediated signaling pathway, regulation of defense response to fungus
LOC106360811	SCM002776.2_29886188	18	LL_E2123, LL_E423	29868071	29870369	-18.1	AT3G55980.1	ATSZF1, TZF11	zinc finger CCCH domain-containing protein 47	response to chitin
LOC106372283	SCM002777.2_46851981	19	LL_E1123, LL_E3123, LL_E4123, LL_CombENV123	46809445	46811968	-42.5	AT5G13580.1	ABCG6	ABC transporter G family member 6	response to nematode
LOC106415792	SCM002777.2_48885679	19	LL_E1123, LL_E2123, LL_E3123, LL_E4123, LL_CombENV123; LW_E1123, LW_E2123, LW_E3123, LW_E4123, LW_CombENV123; PM_14D123	48919901	48923946	34.22	……………..	……………….	probable disease resistance protein RPP1	TIR-NB-LRR receptor-like protein that confers resistance to the pathogen, defense response to fungus, response to oomycetes. Source: (TAIR)
LOC106416705	SCM002777.2_48885679	19	LL_E1123, LL_E2123, LL_E3123, LL_E4123, LL_CombENV123; LW_E1123, LW_E2123, LW_E3123, LW_E4123, LW_CombENV123; PM_14D123	48863762	48864762	-21.9	…………….	……………….	transcriptional corepressor SEUSS	response to fungus, Source: UniProtKB, response to oxidative stress Source: UniProtKB
	Traits, Env & Modela, Traits: LL, Lesion length; LW, Lesion width; PM_14D, Combined environment (CombENV) plant mortality at 14 days post inoculation (dpi); PM_21D, Combined environment (CombENV) plant mortality at 21 dpi; Environments: E1, Carrington 2019; E2, Landon 2019; E3, Carrington 2020; E4, Osnabrock 2020; CombENV, combined analysis across four environments; Model: superscript 1, 2 & 3 re…
	Marker distance from gene (kb)b , Negative values = genes are downstream of the markers, positive values= genes are upstream of the marker
