# Supplementary material for: Genome-Wide Association Mapping and Genomic Prediction for Adult Stage Sclerotinia Stem Rot Resistance in Brassica Napus (L) Under Field Environments
Source: Research Square preprint supplement (doi:10.21203/rs.3.rs-589440/v1), 2021-06-17
Supplement: Supplementary file 3 [file b11029910aa98c9ec37775c5.docx]

**Supplementary Table S8**. Mean predictive ability for combined data (combENV) lesion length, lesion width, and plant mortality for sclerotinia stem rot resistance in the GWAS population, derived using all SNPs and subset of SNPs meeting GWAS-based criteria.

| Traitsa | GWAS threshold | GWAS threshold symbol | Number of SNPs | Prediction accuracy |
| --- | --- | --- | --- | --- |
| LL_CombENV | - | T0 | 25,809 | 0.43 |
| LL_ CombENV | -log10(*P*) > 0.01 | T1 | 260 | 0.84 |
| LL_ CombENV | -log10(*P*) > 0.001 | T2 | 40 | 0.65 |
| LL_ CombENV | -log10(*P*) > 0.0004 | T3 | 14 | 0.55 |
| LW_ CombENV | - | T0 | 25,809 | 0.44 |
| LW_ CombENV | -log10(*P*) > 0.01 | T1 | 189 | 0.87 |
| LW_ CombENV | -log10(*P*) > 0.001 | T2 | 30 | 0.77 |
| LW_ CombENV | -log10(*P*) > 0.0004 | T3 | 17 | 0.68 |
| PM_14D_ CombENV | - | T0 | 25,809 | 0.49 |
| PM_14D_ CombENV | -log10(*P*) > 0.01 | T1 | 292 | 0.86 |
| PM_14D_ CombENV | -log10(*P*) > 0.001 | T2 | 29 | 0.79 |
| PM_14D_ CombENV | -log10(*P*) > 0.0004 | T3 | 15 | 0.74 |
| PM_21D_ CombENV | - | T0 | 25,809 | 0.63 |
| PM_21D_ CombENV | -log10(*P*) > 0.01 | T1 | 208 | 0.82 |
| PM_21D_ CombENV | -log10(*P*) > 0.001 | T2 | 32 | 0.88 |
| PM_21D_ CombENV | -log10(*P*) > 0.0004 | T3 | 19 | 0.86 |

Traitsa : LL_ CombENV, combined lesion length across four environments; LW_CombENV, combined lesion width across four environments; PM_14D_ CombENV, combined plant mortality at 14 days post inoculation (dpi) across four environments; PM_21D_CombENV, combined plant mortality at 21 dpi across four environments
