# Supplementary material for: Genome-Wide Association Mapping and Genomic Prediction for Adult Stage Sclerotinia Stem Rot Resistance in Brassica Napus (L) Under Field Environments
Source: Research Square preprint supplement (doi:10.21203/rs.3.rs-589440/v1), 2021-06-17
Supplement: Supplementary file 4 [file c9cdf379390f3b52951f0a9b.xlsx]

## Sheet: Sheet1
Supplementary Table S5. Marker-trait-associations (MTAs) with combENV plant mortality (14D, 21D) for sclerotinia stem rot resistance in 187 canola/rapeseed genotypes analyzed by the FarmCPU, MLM, GEMMA-MLM
Locus	Chra	SNP ID	Position (bp)	Allelesb	-log10 (P)c	Trait & Modeld	Allelic effecte	R2 f
1	1	SCM002759.2_1471693	1471693	A/T	4.0-3.2	PM_14D123; PM_21D23	-3.51; -3.34	3.9-5.3
2	1	SCM002759.2_5322870	5322870	T/A	3.5-3.3	PM_21D23	-6.28	3.9
	1	SCM002759.2_5323805	5323805	G/A	3.4-3.2	PM_21D23	-6.12	3.8
3	3	SCM002761.2_660936	660936	T/A	5.7-3.5	PM_21D123	6.49, 4.85	4.3
4	3	SCM002761.2_8296124	8296124	G/A	3.4-3.2	PM_14D123	5.41	4.8
5	3	SCM002761.2_31300829	31300829	G/A	3.4-3.2	PM_21D23	7.94	3.8
6	3	SCM002761.2_31986941	31986941	G/A	3.9-3.0	PM_14D123, PM_21D23	4.43, 4.15	3.6-5.5
7	4	SCM002762.2_16168004	16168004	G/C	3.5-3.1	PM_14D13, PM_21D23	4.07, 3.79	4
8	4	SCM002762.2_20789292	20789292	G/A	3.7-3.1	PM_21D23	-3.32	3.7
9	4	SCM002762.2_20860192	20860192	A/T	4.0-3.7	PM_21D23	4.11	4.6
10	6	SCM002764.2_8266872	8266872	G/C	3.5-3.0	PM_21D23	5.36	3.6
11	6	SCM002764.2_24985572	24985572	G/A	3.4-3.2	PM_21D23	3.20	3.8
12	8	SCM002766.2_17407234	17407234	G/T	3.5-3.3	PM_21D23	-10.6634	4
13	8	SCM002766.2_20760271	20760271	G/C	4.3-3.6	PM_14D123, PM_21D23	4.01, 3.82	5.0-5.4
14	8	SCM002766.2_22920266	22920266	T/C	3.8-3.3	PM_14D3, PM_21D23	7.24	4.4
15	9	SCM002767.2_35588232	35588232	T/C	6.8-3.9	PM_21D123	-7.47, -5.64	4.8
16	9	SCM002767.2_36527400	36527400	T/C	3.8-3.1	PM_14D123, PM_21D3	-5.83	5.4
17	9	SCM002767.2_43331392	43331392	C/A	3.4-3.0	PM_14D123, PM_21D23	-3.43, -3.30	3.6-4.6
	9	SCM002767.2_43506803	43506803	G/T	3.4-3.1	PM_21D23	3.26	3.7
18	10	SCM002768.2_4273597	4273597	G/A	4.0-3.1	PM_14D13, PM_21D23	-11.29, -9.48	4.5
19	10	SCM002768.2_5144576	5144576	T/C	7.4-3.2	PM_14D123, PM_21D123	5.74, 4.04	4.7-7.7
20	11	SCM002769.2_6223969	6223969	T/C	3.5-3.3	PM_14D123	-6.05	5
21	11	SCM002769.2_46192098	46192098	T/C	4.1-3.0	PM_14D123, PM_21D123	-9.69, -5.60	4.4-4.8
22	13	SCM002771.2_7740873	7740873	C/A	3.5-3.0	PM_14D13, PM_21D23	4.19, 3.97	3.7
23	14	SCM002772.2_3422830	3422830	G/A	3.5-3.3	PM_14D123	7.66	4.9
24	14	SCM002772.2_29581828	29581828	C/A	4.6-3.1	PM_14D123, PM_21D123	-9.74, -5.74	3.7-6.6
25	14	SCM002772.2_53077839	53077839	A/G	4.2-3.9	PM_14D123	4.22	6
26	15	SCM002773.2_9748366	9748366	T/C	4.1-3.5	PM_21D123	5.77, 3.23	4.3
27	15	SCM002773.2_36238886	36238886	G/T	3.6-3.4	PM_21D23	-3.93864	4.2
28	15	SCM002773.2_36273958	36273958	A/G	3.7-3.4	PM_21D23	-3.89154	4.2
29	16	SCM002774.2_14148427	14148427	G/A	3.6-3.4	PM_21D23	6.91	4.1
30	16	SCM002774.2_23440605	23440605	G/T	4.0-3.6	PM_21D23	-8.68	4.5
31	16	SCM002774.2_25739024	25739024	T/C	4.0-3.8	PM_14D123	3.64	5.7
32	16	SCM002774.2_33563646	33563646	T/A	4.0-3.7	PM_14D123	4.06	5.7
33	18	SCM002776.2_7320194	7320194	G/T	4.0-3.7	PM_14D123	6.27	5.7
34	18	SCM002776.2_12692146	12692146	T/G	3.6-3.3	PM_21D23	-4.71	4
35	18	SCM002776.2_41681055	41681055	C/T	3.5-3.3	PM_14D123	7.14	5
36	19	SCM002777.2_34413846	34413846	C/T	7.0-3.2	PM_21D123	-10.25, -9.21	3.8
37	19	SCM002777.2_48885679	48885679	C/T	4.6-4.3	PM_14D123	9.37	6.7
	Chra, Brassica napus chromosome number
	Allelesb, ( / ) Major allele/minor allele
	-log10 (P)c, The highest and lowest -log10 (P) value resulted from the studied environments with different GWAS models where the identified SNPs -log10 (P) value ≥3.4 by at least of the GWAS models
	Trait & Modeld, Trait: PM_14D, comENV average plant mortality at 14 days post inoculation across four environments; PM_21D, combENV average plant mortality at 21 days post inoculation; Model: superscript 1, 2 & 3 represents FarmCPU, MLM and GEMMA-MLM GWAS models respectively.
	Allelic effecte, difference in mean stem plant mortality (%) between genotypes with major allele and minor allele. Positive sign indicates major allele is associated with increased plant mortality (%). Negative sign indicates that the major allele is associated with reduced plant mortality (%)
	R2 f, Percentage of phenotypic variation explained by the identified significant SNP derived from the results of MLM method
	¶ The SNP markers in light green shade present in both PM_14D and PM_21D traits and identified by at least two GWAS models out of the three used GWAS models (FarmCPU, MLM, GEMMA-MLM)
