# Supplementary material for: Genome-Wide Association Mapping and Genomic Prediction for Adult Stage Sclerotinia Stem Rot Resistance in Brassica Napus (L) Under Field Environments
Source: Research Square preprint supplement (doi:10.21203/rs.3.rs-589440/v1), 2021-06-17
Supplement: Supplementary file 5 [file cb141a704b6ad8c546842bc7.xlsx]

## Sheet: Table S3
Supplementary Table S3. Marker-trait-associations (MTAs) with stem lesion length (cm) for Sclerotinia stem rot resistance in 187 canola/rapeseed genotypes analyzed by the FarmCPU, MLM, GEMMA-MLM
Locus	Chra	SNP ID	Position (bp)	Allelesb	-log10 (P)c	Env & Modeld	Allelic effecte	R2 f
1	1	SCM002759.2_1471693	1471693	A/T	4.3-3.1	E1123, E223, E423, CombENV123	-0.30, -0.22	4.8-7.0
2	1	SCM002759.2_1766199	1766199	A/G	3.6-3.0	E2123, CombENV123	0.47, 0.37	4.6-5.6
3	1	SCM002759.2_4239970	4239970	A/C	4.8-3.3	E2123, E423, CombENV23	-0.34; -0.25	5.4-7.3
4	1	SCM002759.2_5478454	5478454	C/T	3.5-3.3	E223	0.38	5.1
5	1	SCM002759.2_11482241	11482241	C/T	3.1-3.4	E1123, E33, CombENV13	-0.28; -0.27	5.4
6	2	SCM002760.2_1865667	1865667	A/C	4.8-3.0	E223, E4123, CombENV23	-0.70, -0.43	4.5-7.7
7	2	SCM002760.2_10378033	10378033	G/A	3.5-3.3	E423	-0.28	5.3
8	2	SCM002760.2_30827371	30827371	C/G	3.6-3.1	E3123	-0.22; -0.21	6.2
9	3	SCM002761.2_17320071	17320071	T/A	3.8-3.1	E2123	-0.56; -0.51	4.8
10	3	SCM002761.2_28225133	28225133	T/C	3.7-3.4	E3123	-0.36	7.2
11	3	SCM002761.2_30742237	30742237	T/C	3.4-3.0	E1123, CombENV3	0.41	5.4
12	3	SCM002761.2_35236913	35236913	C/A	3.5-3.2	E3123	-0.20	6.7
13	3	SCM002761.2_36170515	36170515	G/A	5.4-4.0	E1123, E3123, CombENV123	0.26, 0.23	7.0-9.9
14	4	SCM002762.2_3551539	3551539	C/T	3.4-3.0	E4123, CombENV123	0.61, 0.45	4.8-5.2
15	4	SCM002762.2_20212672	20212672	T/A	4.5-3.0	E3123,CombENV13	-0.56; -0.44	5.0-8.6
16	5	SCM002763.2_15914063	15914063	G/A	5.2-3.0	E2123, E4123, CombENV123	-0.59; -0.33	5.0-8.0
17	5	SCM002763.2_16279322	16279322	A/C	3.7-3.1	E3123, CombENV23	-0.39; -0.34	5.1-7.2
18	5	SCM002763.2_28142332	28142332	A/G	3.9-3.1	E2123	0.24; 0.27	4.7
19	5	SCM002763.2_28608175	28608175	A/G	3.5-3.3	E2123	0.42; 0.38	5.1
20	6	SCM002764.2_25241979	25241979	C/A	3.3-3.0	E113, E323, CombENV123	-0.47; -0.45	5.0-5.9
21	7	SCM002765.2_25991221	25991221	G/C	3.7-3.1	E1123, E2123, CombENV3	-0.63; -0.51	5.4-5.5
22	8	SCM002766.2_1982656	1982656	G/C	4.6-3.1	E3123, E4123, CombENV123	-0.57; -0.38	7.0-7.5
23	8	SCM002766.2_13657808	13657808	T/G	3.5-3.0	E3123	-0.41	6
24	8	SCM002766.2_13864870	13864870	A/G	3.7-3.1	E2123, E4123, CombENV123	0.67, 0.47	5.2-5.7
25	9	SCM002767.2_37664281	37664281	A/G	3.9-3.7	E4123	-0.34	6.2
26	9	SCM002767.2_37671479	37671479	G/A	3.6-3.1	E1123, E21	-0.31; -0.27	5.9
27	9	SCM002767.2_39128782	39128782	T/C	3.6-3.2	E1123, CombENV123	-0.60; -0.56	5.4-6.0
28	9	SCM002767.2_43041855	43041855	C/T	3.8-3.5	E3123	0.65	7.1
29	9	SCM002767.2_45297735	45297735	T/C	4.0-3.3	E2123, E413, CombENV2	-0.47; -0.33	5.1-6.1
30	9	SCM002767.2_45841268	45841268	A/T	3.5-3.0	E3123, CombENV13	0.44, 0.43	6
31	11	SCM002769.2_6223969	6223969	T/C	4.4-3.3	E1123, E3123, CombENV123	-0.45; -0.38	6.0-7.3
32	11	SCM002769.2_46192098	46192098	T/C	4.2-3.0	E2123, E423, CombENV23	-0.74; -0.52	4.9-6.4
33	12	SCM002770.2_25096010	25096010	A/T	3.6-3.0	E3123, CombENV1	0.50, 0.49	6.1
34	12	SCM002770.2_32020747	32020747	A/G	4.0-3.0	E2123, E413, CombENV123	0.46, 0.34	5.1-6.0
35	12	SCM002770.2_62791159	62791159	T/C	3.6-3.3	E3123	-0.35; -0.34	7
36	13	SCM002771.2_7893201	7893201	C/G	5.0-3.1	E2123, E4123, CombENV13	0.78, 0.47	5.7-7.9
37	13	SCM002771.2_22853068	22853068	G/A	3.7-3.0	E2123, E4123, CombENV123	-0.50; -0.38	4.9-5.3
38	13	SCM002771.2_45250459	45250459	T/G	3.8-3.5	E1123	0.26	6.2
39	13	SCM002771.2_56900783	56900783	G/A	3.8-3.0	E1123, E3123, CombENV13	0.40, 0.34	4.9-7.4
40	13	SCM002771.2_69833085	69833085	C/T	3.7-3.2	E223	0.396464	5.6
	13	SCM002771.2_69833922	69833922	C/G	3.4-3.2	E223	0.367487	5
41	13	SCM002771.2_78761785	78761785	G/T	3.5-3.0	E43, CombENV123	0.68, 0.63	5.3
42	13	SCM002771.2_80035604	80035604	C/T	3.4-3.0	E13; E33; CombENV23	0.637825	5.3
43	14	SCM002772.2_65359864	65359864	C/T	4.5-3.1	E1123, E213, CombENV123	0.82; 0.72	6.6-7.6
44	15	SCM002773.2_29580386	29580386	A/T	3.7-3.0	E33, E423, CombENV23	0.78, 0.60	5.1-6.0
45	15	SCM002773.2_38993115	38993115	A/C	3.9-3.0	E1123, CombENV23	0.51, 0.44	5.0-6.6
46	16	SCM002774.2_22279509	22279509	A/G	3.8-3.0	E4123, CombENV123	-0.45, -0.28	4.9-5.7
47	16	SCM002774.2_22321613	22321613	C/A	3.5-3.1	E413, CombENV1	0.39, 0.26
48	16	SCM002774.2_22403960	22403960	A/C	4.0-3.0	E4123, CombENV1	-0.42, -0.27	5
49	16	SCM002774.2_23837210	23837210	A/T	3.4-3.1	E413, CombENV13	-0.36, -0.26
50	16	SCM002774.2_25678898	25678898	T/C	3.8-3.0	E223, E4123	0.35, 0.23	4.7-6.0
51	16	SCM002774.2_25739024	25739024	T/C	3.7-3.0	E1123, E313, E41, CombENV123	0.29, 0.21	5.0-5.4
52	16	SCM002774.2_33238118	33238118	G/T	3.4-3.0	E3123	-0.32	5.9
	16	SCM002774.2_33265642	33265642	G/C	3.4-3.1	E3123	0.31	6.2
53	16	SCM002774.2_33563646	33563646	T/A	4.0-3.0	E1123,E21,E3123, E41, CombENV123	0.32, 0.25	5.4-6.0
54	16	SCM002774.2_34137593	34137593	C/T	4.5-3.0	E1123, E2123, E4123, CombENV123	-0.36, -0.25	4.6-6.8
55	16	SCM002774.2_34149554	34149554	T/C	3.8-3.0	E21, E4123, CombENV1	0.37, 0.24	4.7
56	16	SCM002774.2_39405155	39405155	A/G	4.0-3.4	E3123	-0.25	6.9
57	17	SCM002775.2_43529605	43529605	C/G	4.0-3.1	E4123; CombENV12	0.51; 0.34	5.1-6.3
58	17	SCM002775.2_49740638	49740638	C/A	3.5-3.1	E423; CombENV23	-0.53; -0.39	5.1-5.2
59	18	SCM002776.2_29886188	29886188	G/C	3.4-3.0	E2123, E423	-0.45, -0.41	4.8-5.0
60	19	SCM002777.2_15808490	15808490	G/A	3.8-3.5	E3123	0.38	7.2
61	19	SCM002777.2_46851981	46851981	G/A	4.0-3.1	E1123, E3123, E4123, CombENV123	-0.84, -0.59	5.3-6.8
62	19	SCM002777.2_48885679	48885679	C/T	5.8-3.3	E1123, E2123, E3123, E4123, CombENV123	0.83, 0.52	5.8-9.2
	Chra, Brassica napus chromosome number
	Allelesb, (_/_) Major allele/minor allele
	-log10 (P)c, The highest and lowest -log10 (P) value resulted from the studied environments with different GWAS models where the identified SNPs -log10 (P) value ≥3.4 by at least of the GWAS models
	Env & Modeld, Environments: E1, Carrington 2019; E2, Landon 2019; E3, Carrington 2020; E4, Osnabrock 2020; CombENV, combined analysis across four environments; Model: superscript 1, 2 & 3 represents FarmCPU, MLM and GEMMA-MLM GWAS models respectively
	Allelic effecte, difference in mean stem lesion length (cm) between genotypes with major allele and minor allele. Positive sign indicates major allele is associated with increased lesion length (cm). Negative sign indicates that the major allele is associated with reduced lesion length (cm)
	R2 f, Percentage of phenotypic variation explained by the identified significant SNP derived from the results of MLM method
	¶ The SNP markers in light green shade present in al least two or more environment and identified by at least two GWAS models out of the three used GWAS models (FarmCPU, MLM, GEMMA-MLM)
